# Supplementary material
Source: PubMed Central journal article supplement (PMC6548321)
Supplement: NIHMS1522608-supplement-1.pdf [file NIHMS1522608-supplement-1.pdf]

**Neuron**

**Supplemental Information**

**Cytoplasmic TDP-43 de-mixing independent of stress granules  
drives inhibition of nuclear import, loss of nuclear TDP-43, and  
cell death**

**Fatima Gasset-Rosa, Shan Lu, Haiyang Yu, Cong Chen, Zevik  
Melamed, Lin Guo, James Shorter, Sandrine Da Cruz and Don W.  
Cleveland**

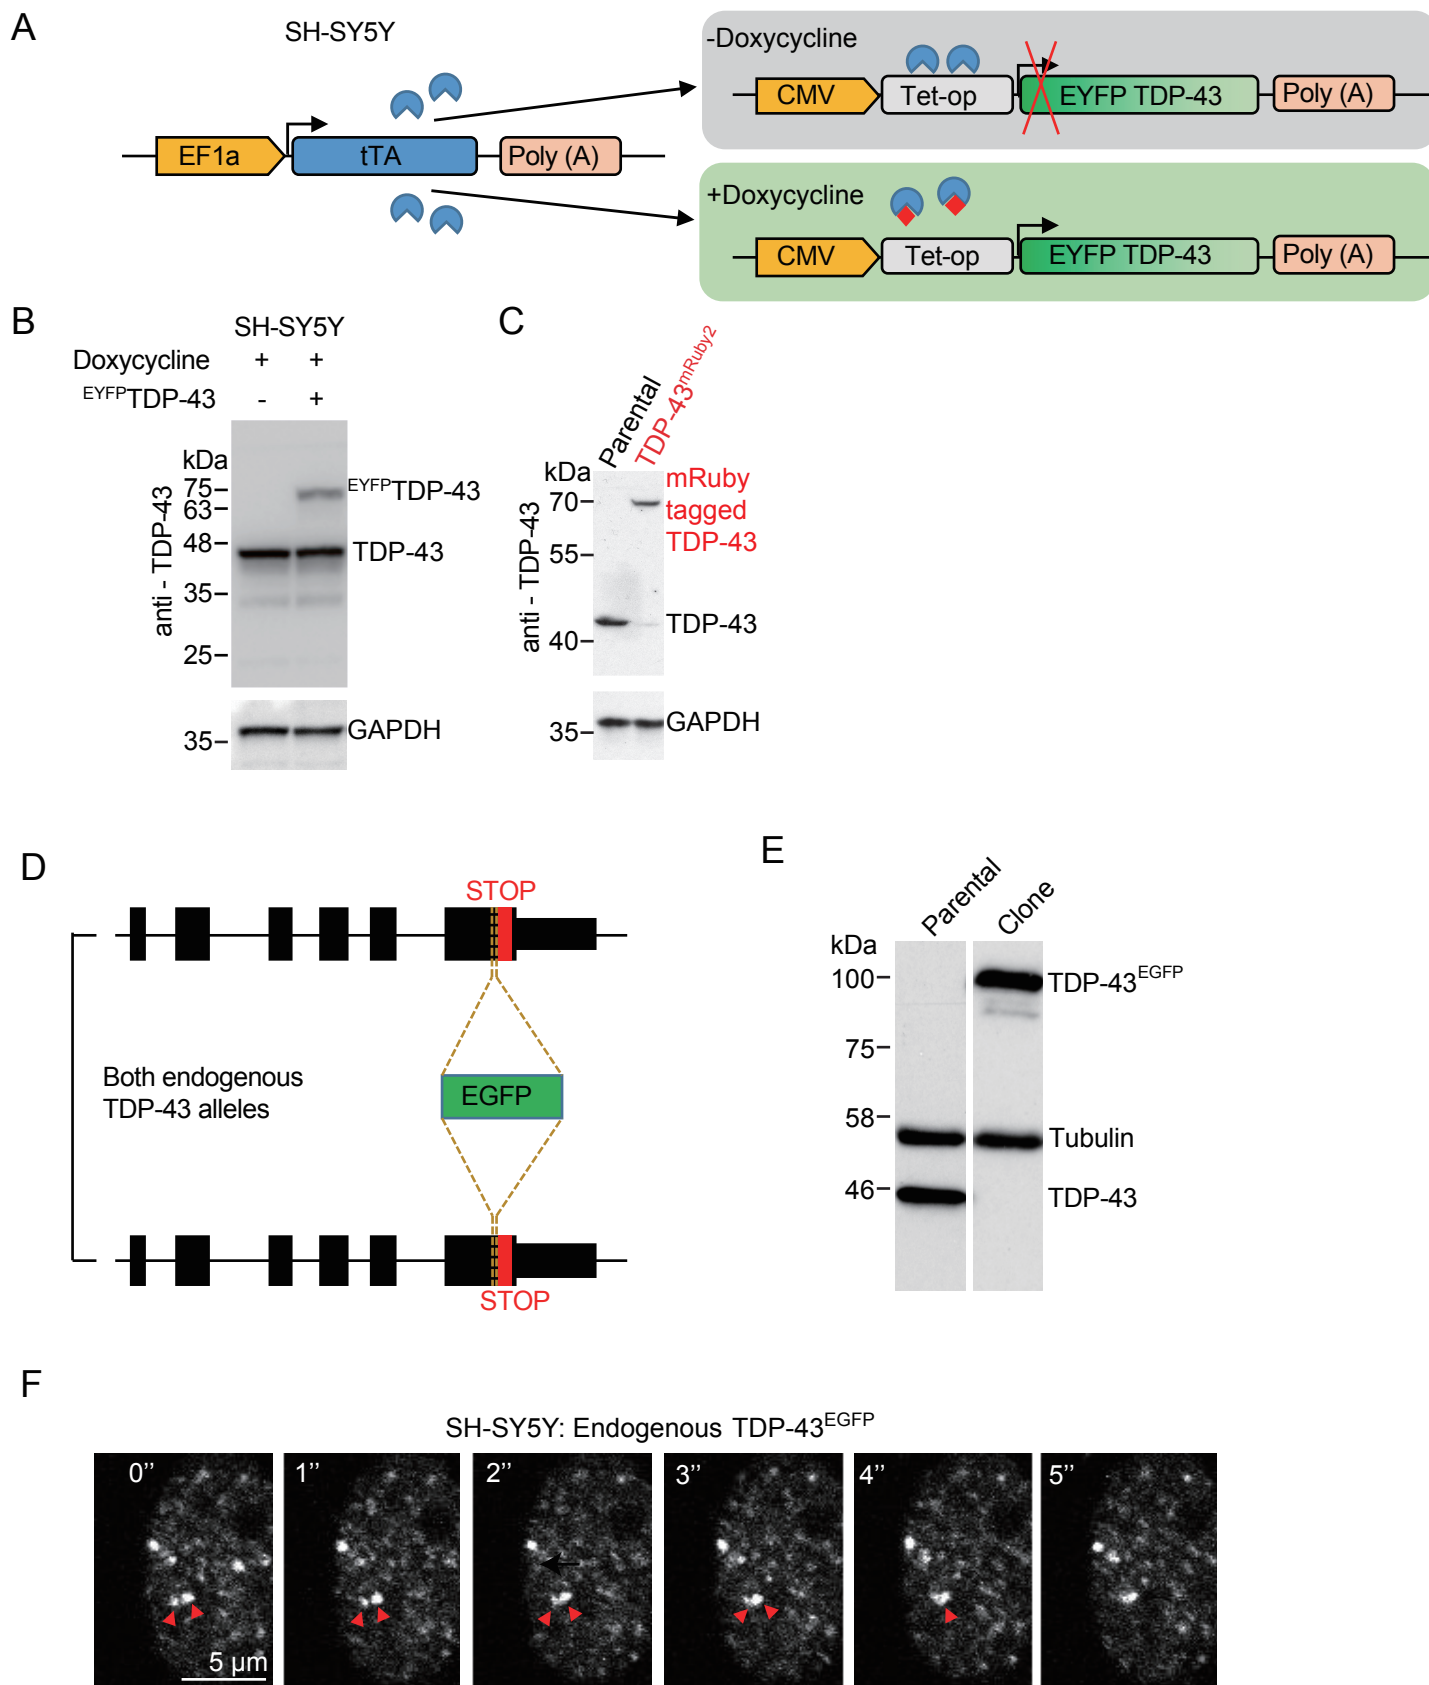

Figure S1. Expression of fluorescently-tagged TDP-43 at physiological levels in SH-SY5Y cells. Related to Figure 1

**Figure S1. Expression of fluorescently-tagged TDP-43 at physiological levels in SH-SY5Y cells. Related to Figure 1**

(A) Scheme outlining doxycycline inducible expression of TDP-43 with N-terminally tagged EYFP (<sup>EYFP</sup>TDP-43) in SH-SY5Y cells. (B) Immunoblot showing <sup>EYFP</sup>TDP-43 levels in SH-SY5Y cells after 72 hours of induction using a TDP-43 antibody. GAPDH antibody was used as loading control. (C) Immunoblotting of TDP-43 levels in U2OS cells expressing TDP-43<sup>mRuby2</sup> upon doxycycline induction compared to endogenous TDP-43. GAPDH was used as loading control. (D) Scheme illustrating the genome editing of TDP-43 locus to introduce EGFP in both TDP-43 alleles before the stop codons in SH-SY5Y cells. (E) Immunoblot showing that TDP-43<sup>EGFP</sup> replaces endogenous TDP-43 with TDP-43 total level being maintained (compared to the parental untagged cells) using TDP-43 antibody. Tubulin antibody was used as loading control. (F) Representative fusion event of endogenous TDP-43<sup>EGFP</sup> droplets in SH-SY5Y cells. Red arrowheads indicate the fusing droplets.

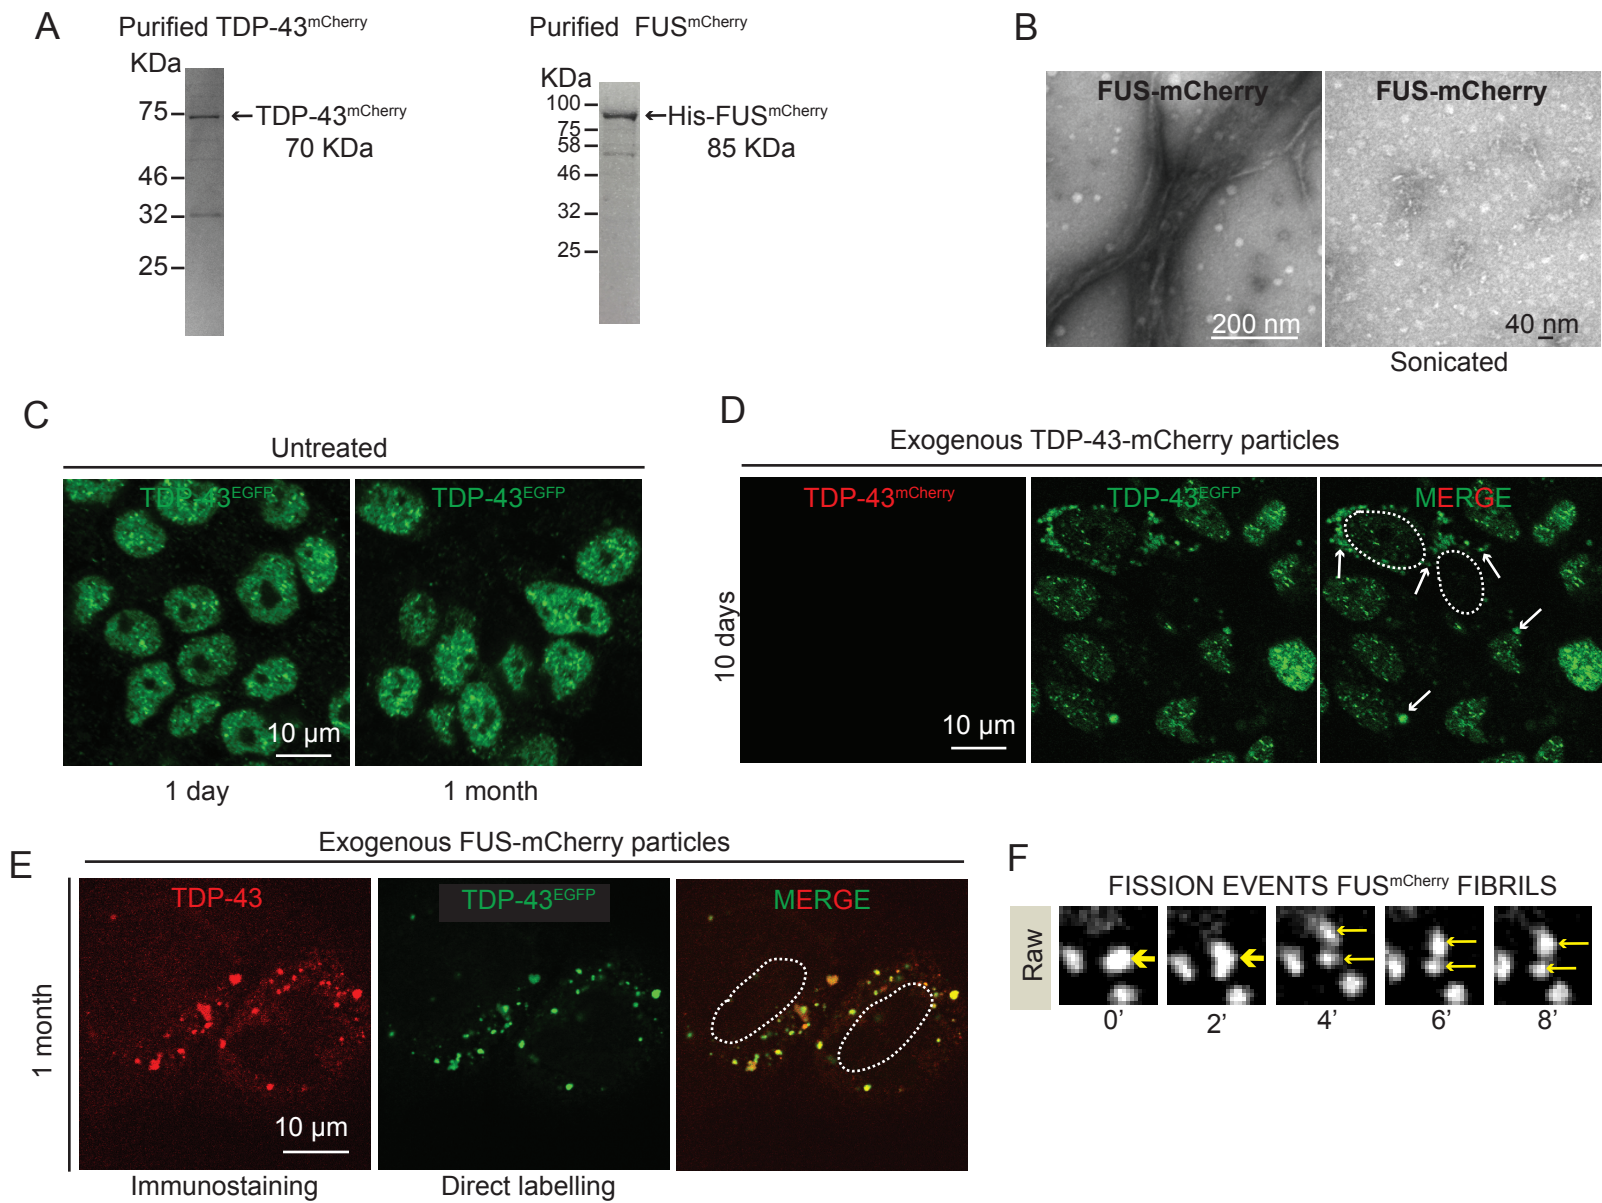

Figure S2. After 10 days of TDP-43<sup>mCherry</sup> particles treatment TDP-43 starts to mislocalize in the cytoplasm and TDP-43 LLPS presents fission events. Related to Figure 2

**Figure S2. After 10 days of TDP-43<sup>mCherry</sup> particles treatment TDP-43 starts to mislocalize in the cytoplasm and TDP-43 LLPS presents fission events. Related to Figure 2**

(A) Coomassie blue staining of recombinant TDP-43<sup>mCherry</sup> protein purified from bacteria at the expected size of 70 KDa (left panel), and FUS<sup>mCherry</sup> protein at the expected size of 85 KDa (right panel). (B) Electron micrograph of amyloid-like fibrils of FUS<sup>mCherry</sup> recombinant protein purified from bacteria. Right panel illustrates the FUS<sup>mCherry</sup> fibrils after sonication before inoculating them into cell media. Scale bars, 200 nm and 40nm (sonicated fibrils). (C) Representative images using confocal microscopy of endogenous nuclear TDP-43<sup>EGFP</sup> in non-fibril-treated SH-SY5Y cells at day 1 (left) and after 1 month of culture (right). Scale bar, 10  $\mu$ m. (D) Representative images using confocal microscopy of neuronal-like SH-SY5Y cells inoculated with sonicated His-TDP-43<sup>mCherry</sup> particles at a final concentration of 200nM and further imaged for TDP-43<sup>mCherry</sup> fibrils (red) and TDP-43<sup>EGFP</sup> (green) at 10 days. Media was changed after 3 days. White arrows indicate cytoplasmic particles containing mislocalized endogenous TDP-43<sup>EGFP</sup> (green). Dashed white line outlines nuclei. Scale bar, 10  $\mu$ m. (E) Representative images using confocal microscopy of neuronal-like SH-SY5Y cells inoculated with sonicated FUS<sup>mCherry</sup> fibrils and immunostained with TDP-43 antibody (red) with direct GFP fluorescence signal from TDP-43<sup>EGFP</sup> (green). Scale bar, 10  $\mu$ m. (F) A representative fission event of cytoplasmic TDP-43<sup>EGFP</sup> LLPS is shown with thick yellow arrow pointing to the particle that is divided into two new particles (two smaller arrows) at minute 4.

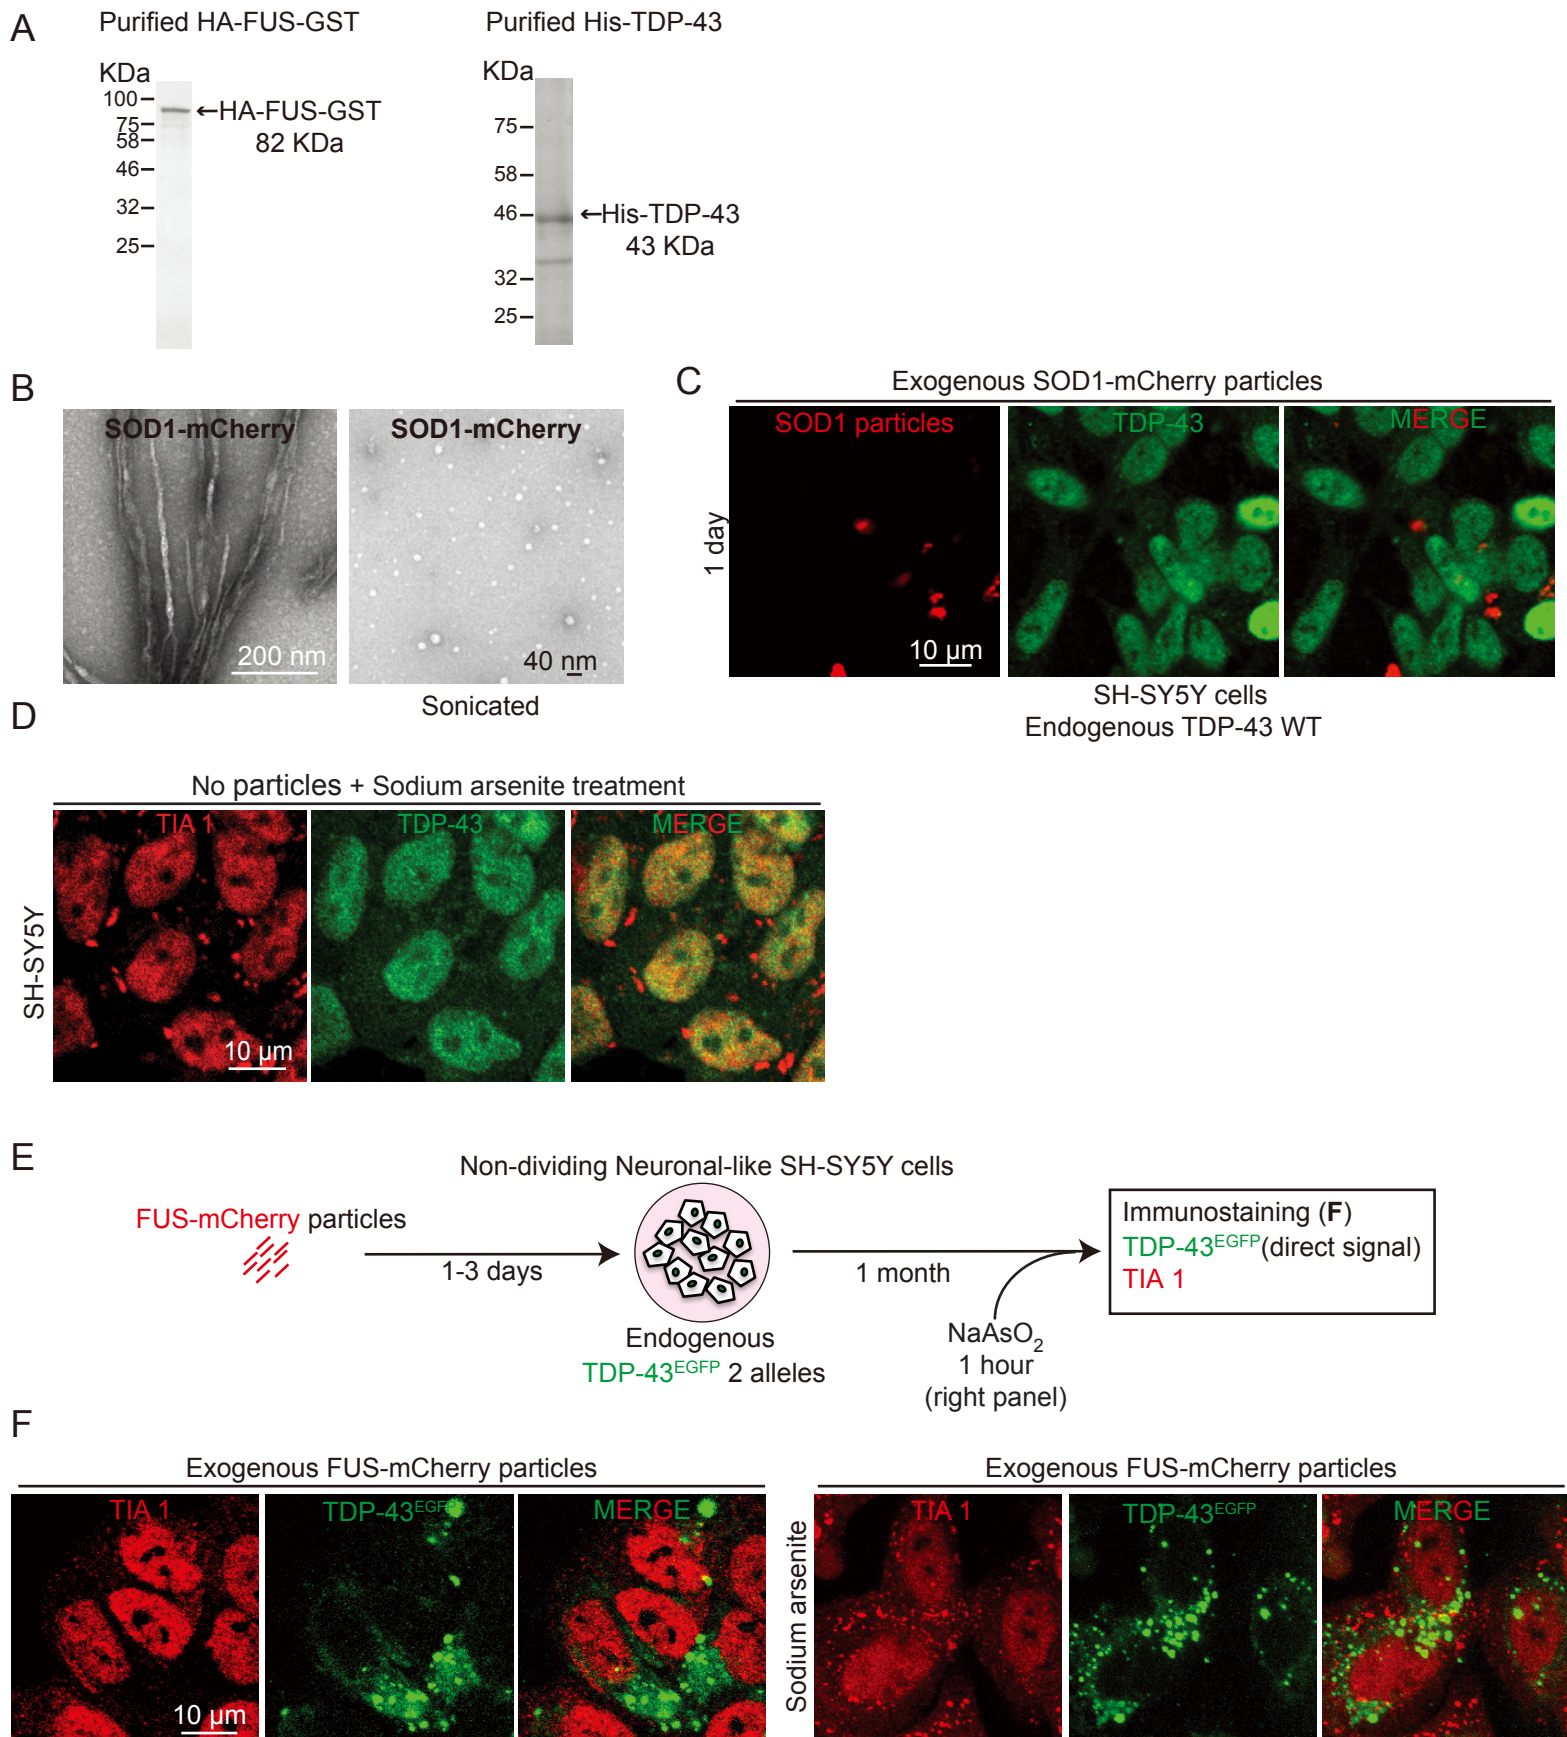

Figure S3. TDP-43 droplets are induced by FU<sub>S</sub> particles, but not SOD1 particles and are independent of stress granules. Related to Figure 3

**Figure S3 TDP-43 droplets are induced by FUS particles, but not SOD1 particles and are independent of stress granules. Related to Figure 3**

(A) Coomassie blue staining of recombinant HA-FUS-(TEV cleavage site)-GST protein purified from bacteria at the expected size of 82 KDa (left panel), and His-TDP-43 protein at the expected size of 43 KDa (right panel). (B) Electron micrograph of amyloid-like fibrils of SOD1<sup>mCherry</sup> recombinant protein purified from bacteria. Right panel illustrates the SOD1<sup>mCherry</sup> fibrils after sonication before inoculating them into cell media. Scale bars, 200 nm and 40nm (sonicated fibrils). (C) Representative images using confocal microscopy of neuronal-like SH-SY5Y cells inoculated with sonicated SOD1<sup>mCherry</sup> particles (red) and immunostained after 1 day TDP-43 antibody. Scale bar, 10  $\mu$ m. (D) Confocal representative images of neuronal-like cells treated with NaAsO<sub>2</sub> (500  $\mu$ M) for 1 hour and immunostained with TIA1 (red) and TDP-43 (green) antibodies to induce TIA1 positive stress granules. (E) Scheme of the experimental design to assess stress granule dependency of endogenously EGFP tagged TDP-43 in non-cycling SH-SY5Y cells (knock-in in both alleles), which were incubated with fluorescently labelled FUS<sup>mCherry</sup> particles and visualized over time by live-imaging or immunofluorescence. (F) Representative images using confocal microscopy of neuronal-like SH-SY5Y cells inoculated with sonicated FUS<sup>mCherry</sup> particles in absence (left panel) or presence of NaAsO<sub>2</sub> for 1 hour (right panel) and further immunostained with stress granules marker TIA1 (red) and cytoplasmic TDP-43<sup>EGFP</sup> (green) after 1 month of fibril treatment. Scale bar, 10  $\mu$ m.

A

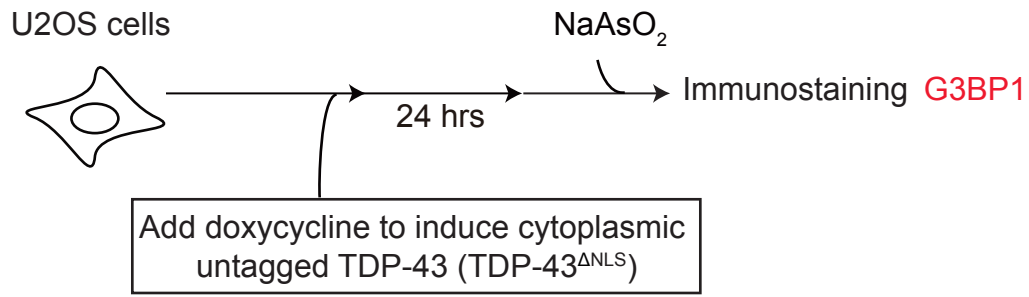

B

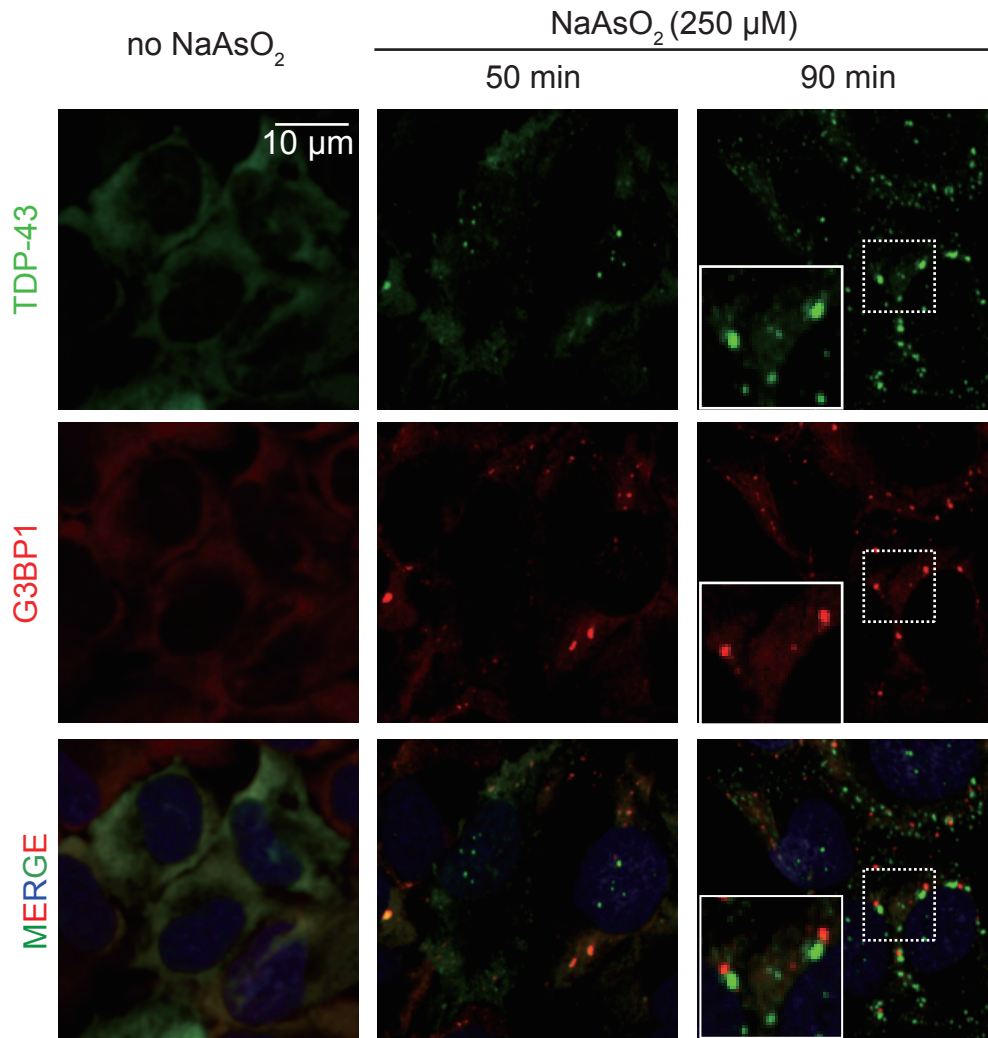Figure S4. Untagged TDP-43<sup>ANLS</sup> forms stress granule independent particles. Related to Figure 4<sub>7</sub>



**Figure S4. Untagged TDP-43<sup>ANLS</sup> forms stress granule independent particles. Related to Figure 4**

(A) Experimental design and (B) immunostaining of untagged cytoplasmic TDP-43 forming stress granule-independent particles after 250  $\mu$ M sodium arsenite treatment of neuronal-like SH-SY5Y cells. G3BP1 was used as a stress granule marker. Scale bar, 10  $\mu$ m.

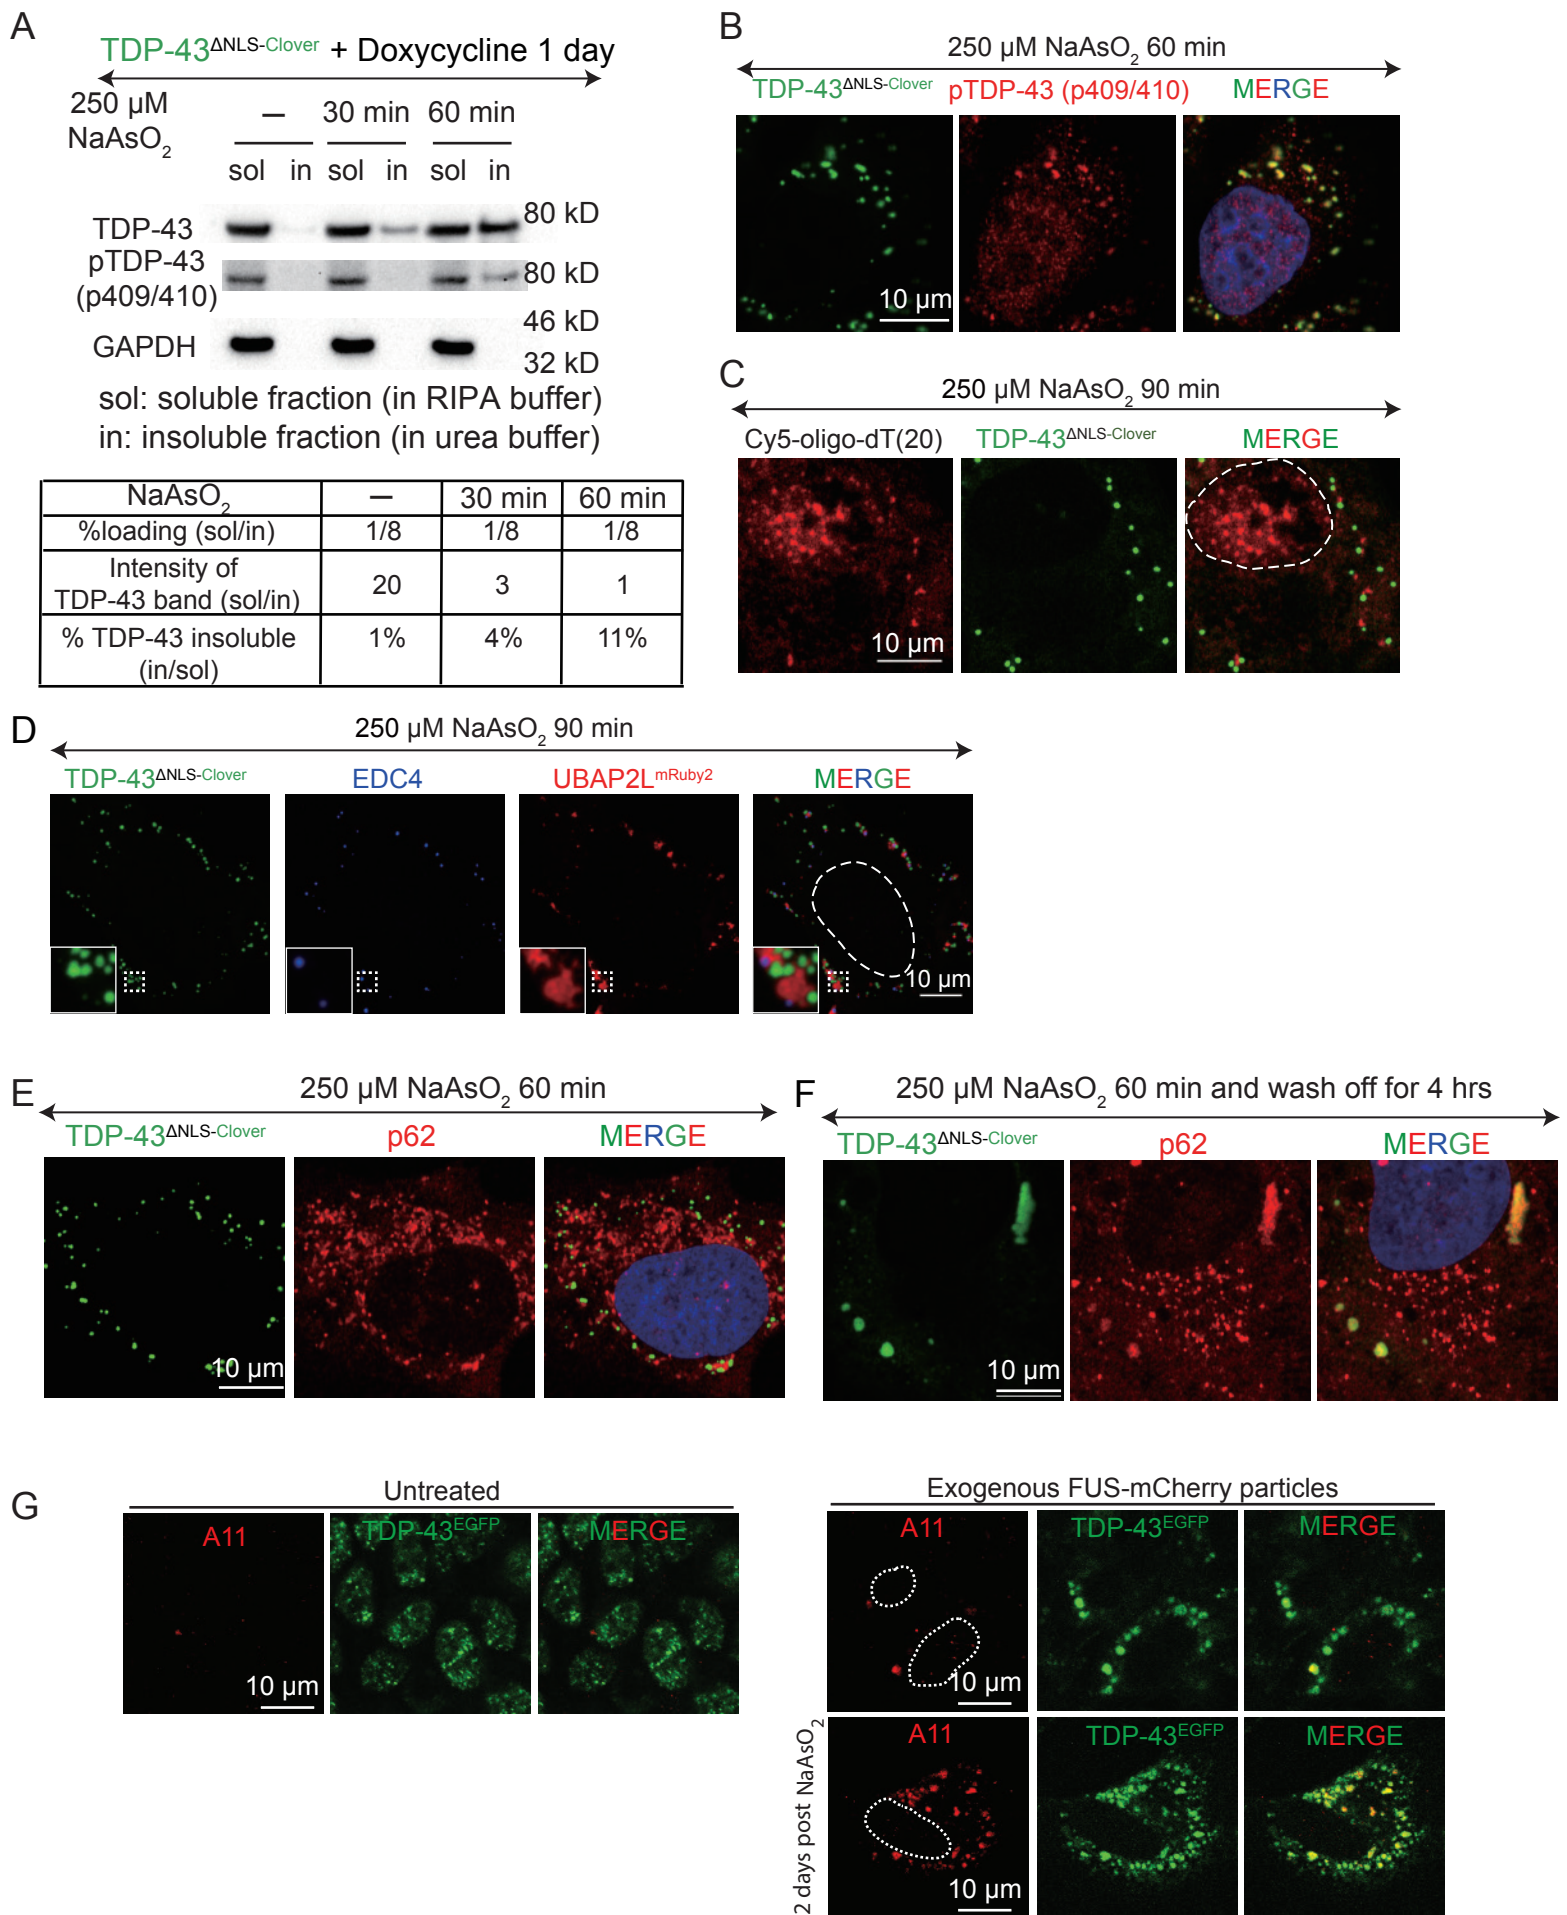

Figure S5. Stress induces the formation of detergent-insoluble TDP-43 inclusions with gel-like particles exhibiting amyloid-like features. Related to Figure 5

**Figure S5. Stress induces the formation of detergent-insoluble TDP-43 inclusions with the gel-like particles exhibiting amyloid-like features. Related to Figure 5**

(A) Western blot analysis of the proportion of TDP-43 and phospho-TDP-43 in the soluble (RIPA buffer) and insoluble (Urea buffer) fractions without or with 30 min or 60 min of 250  $\mu$ M sodium arsenite treatment. GAPDH was used as loading control. (B) Representative image of phospho-TDP-43 immunostaining (red) in neuronal-like SH-SY5Y cells that accumulate cytoplasmic TDP-43 <sup>$\Delta$ NLS-Clover</sup> particles (green) after 60 min of 250  $\mu$ M sodium arsenite treatment. Scale bar, 10  $\mu$ m. (C) Representative image of mRNA (red) using FISH and cytoplasmic TDP-43 <sup>$\Delta$ NLS-Clover</sup> particles (green) after 90 min of 250  $\mu$ M sodium arsenite treatment (red). Scale bar, 10  $\mu$ m. (D) Representative image of EDC4 (P body) immunostaining (blue) in neuronal-like SH-SY5Y cells that form stress granule-independent cytoplasmic TDP-43 <sup>$\Delta$ NLS-Clover</sup> particles (green) and stress granules indicated by UBAP2L<sup>mRuby2</sup> (red) after 90 min of 250  $\mu$ M sodium arsenite treatment. Scale bar, 10  $\mu$ m. (E-F) Representative image of p62 immunostaining (red) with cytoplasmic TDP-43 <sup>$\Delta$ NLS-Clover</sup> particles after 60 min of 250  $\mu$ M sodium arsenite treatment (E) or in the cells with remaining cytoplasmic TDP-43 <sup>$\Delta$ NLS-Clover</sup> particles after a four hour of wash off of 250  $\mu$ M sodium arsenite (F). Scale bar, 10  $\mu$ m. (G) Representative images using confocal microscopy of neuronal-like SH-SY5Y cells inoculated with sonicated FUS<sup>mCherry</sup> particles in absence or presence of NaAsO<sub>2</sub> for 30 minutes (lower panel) and further immunostained with amyloid-oligomers antibody A11 (red) and cytoplasmic TDP-43<sup>EGFP</sup> (green) after 1 month of fibril treatment or in absence of fibril treatment (left panel). Scale bar, 10  $\mu$ m.

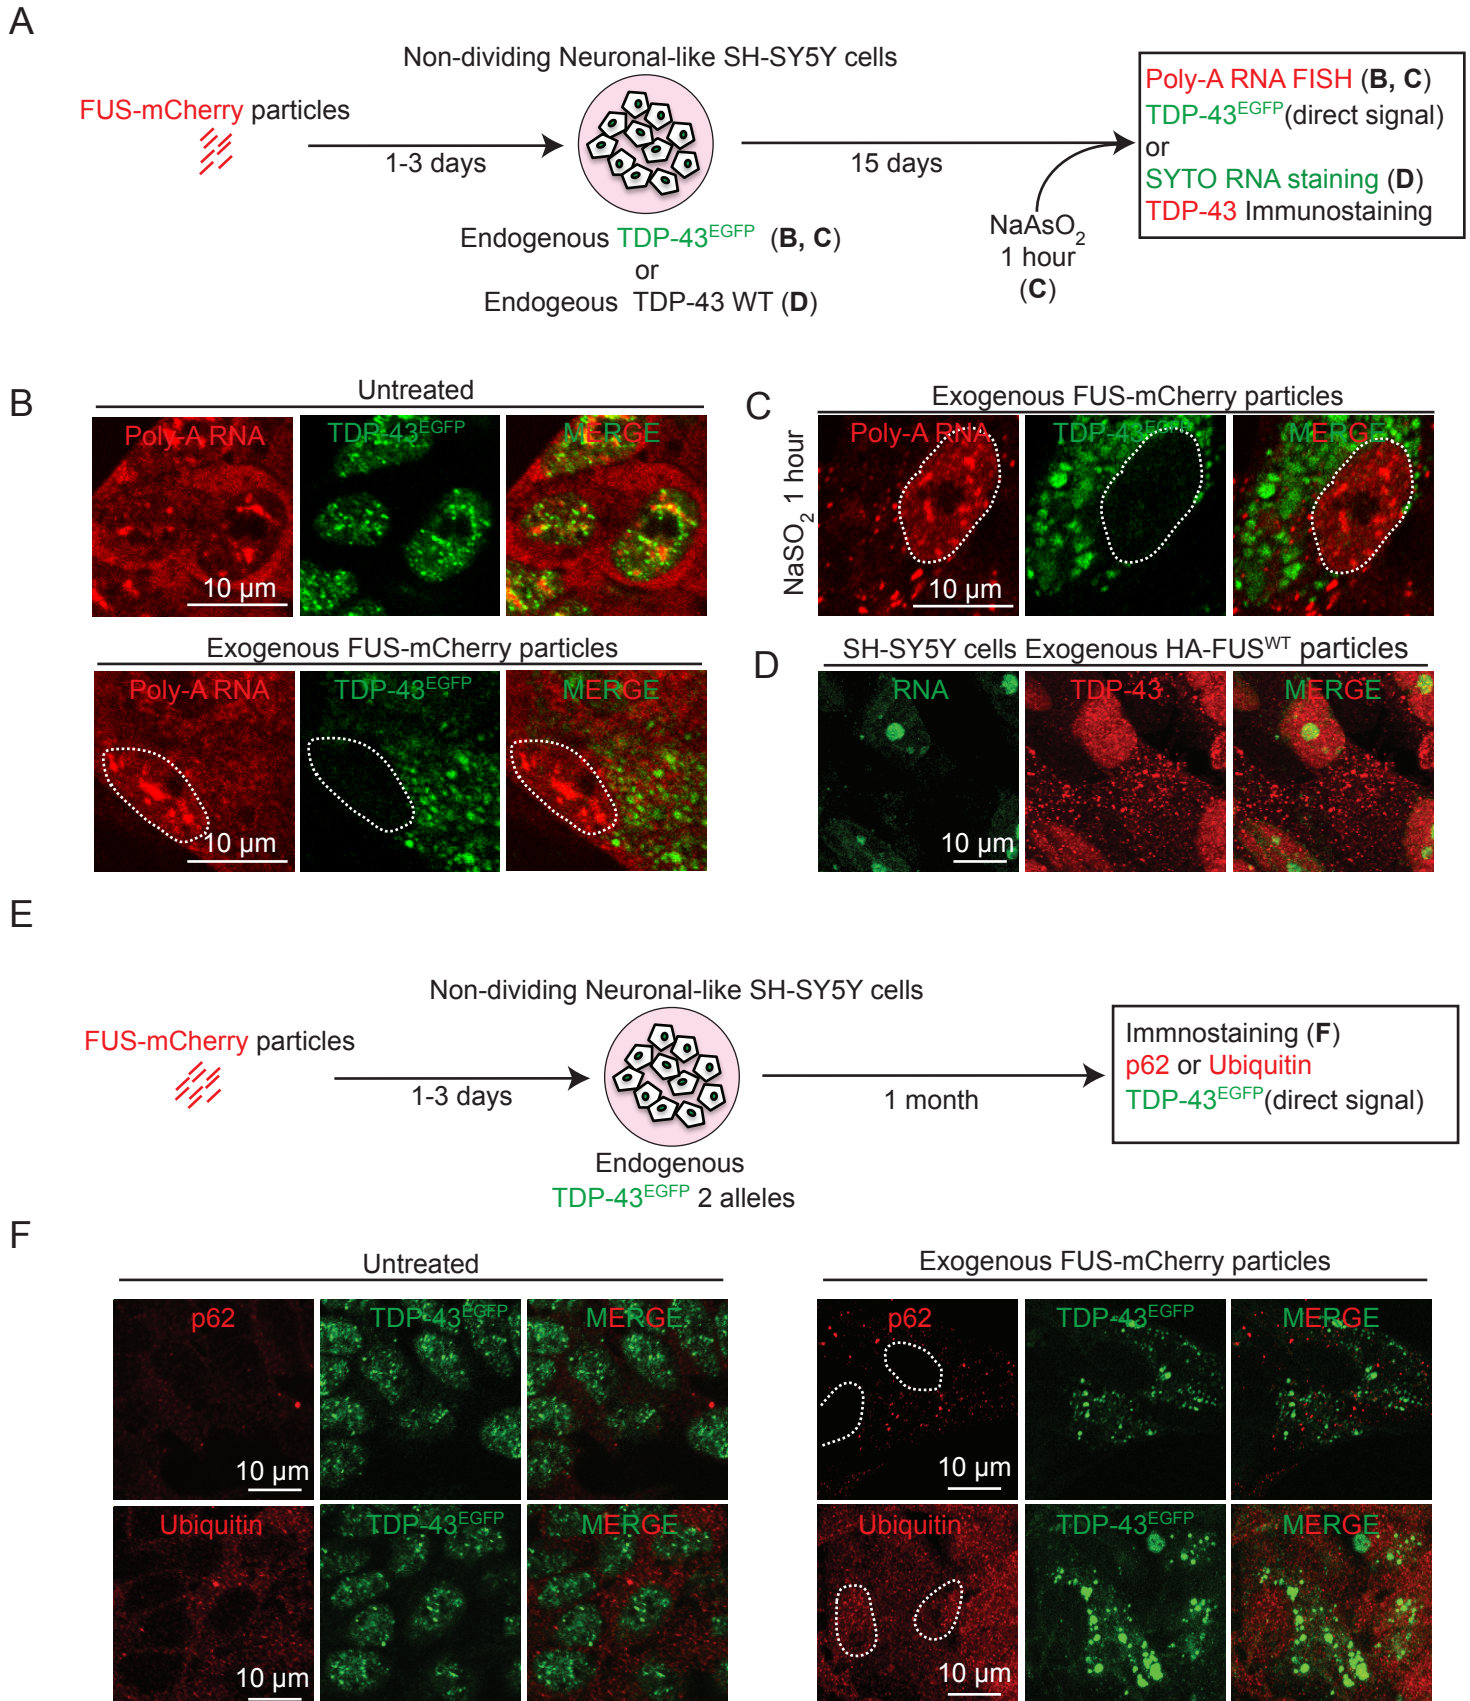

Figure S6. Cytoplasmic TDP-43 de-mixed droplets remain liquid for long periods and do not co-localize with polyA-containing RNAs. Related to Figure 7

**Figure S6. Cytoplasmic TDP-43 de-mixed droplets remain liquid for long periods and do not co-localize with polyA-containing RNAs. Related to Figure 7**

(A) Scheme of the experimental design to assess LLPS properties of endogenous TDP-43<sup>EGFP</sup> in cells and determine recruitment of RNA within the droplets (B-C) Representative images using confocal microscopy of neuronal-like SH-SY5Y cells (endogenously EGFP tagged TDP-43) 1 month after inoculation of sonicated FUS<sup>mCherry</sup> particles revealing Poly-A-RNA using fluorescence in situ hybridization (FISH) (grey) and cytoplasmic TDP-43<sup>EGFP</sup> (green) or (C) subsequently treated for one hour of NaAsO<sub>2</sub> (0.5 mM). (D) Neuronal-like SH-SY5Y cells 1 month after inoculation of sonicated FUS<sup>mCherry</sup> fibrils further stained with SYTO RNA (green) and TDP-43 (red). Scale bar, 10 μm. (E) Scheme of the experimental design to assess LLPS properties of endogenous TDP-43<sup>EGFP</sup> in cells and determine LLPS features. (F) Representative images using confocal microscopy of neuronal-like SH-SY5Y cells 1 month after inoculation of sonicated FUS<sup>mCherry</sup> fibrils and further immunostained with p62 (upper panel) or ubiquitin (lower panel) (red) and cytoplasmic TDP-43<sup>EGFP</sup> (green). Left panel illustrates cells in absence of fibril treatment. Scale bar, 10 μm.

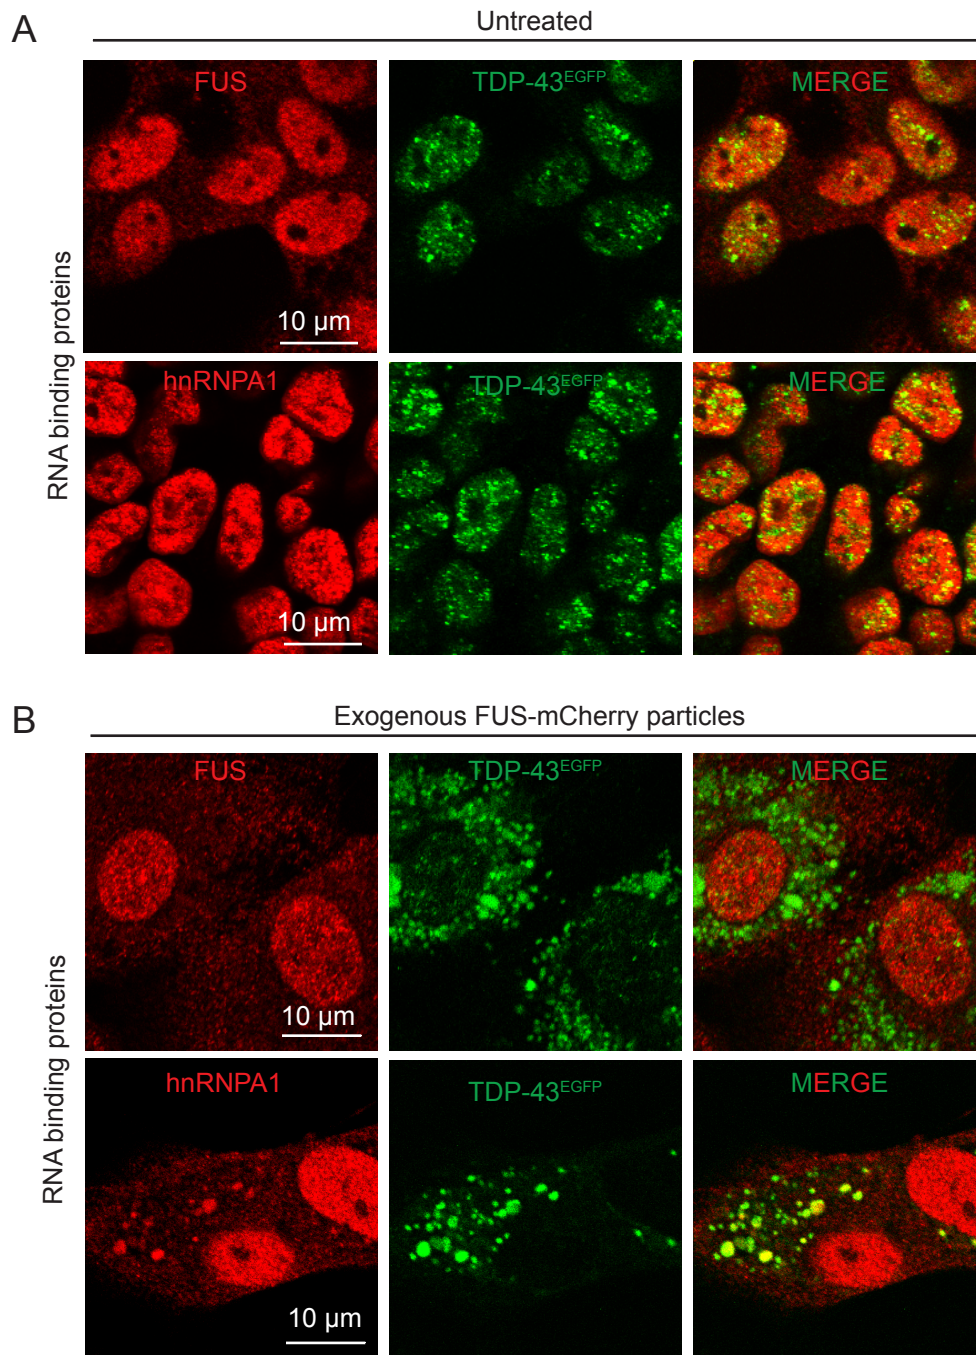

Figure S7. TDP-43 LLPS induces mislocalization of hnRNPA1 and FUS into the cytoplasm due to nuclear import defects. Related to Figure 8

**Figure S7. TDP-43 LLPS induces mislocalization of hnRNPA1 and FUS into the cytoplasm due to nuclear import defects. Related to Figure 8**

(A-B) Representative images using confocal microscopy of neuronal-like SH-SY5Y cells in absence of fibril treatment (A) or 1 month after inoculation of sonicated FUS<sup>mCherry</sup> fibrils (B) and further immunostained with FUS (upper panel), hnRNPA1 (lower panel) (red) and cytoplasmic TDP-43<sup>EGFP</sup> (green). Scale bar, 10  $\mu$ m.
